# Supplementary material for: A fast synthesis of hierarchical yolk–shell copper hydroxysulfates at room temperature with adjustable sizes
Source: Royal Society of Chemistry journal article supplement (doi:10.1039/c3ce42256a), 2014-01-01
Supplement: c3ce42256a.pdf [file c3ce42256a.pdf]

## Supporting Information

### **Fast synthesis of hierarchical yolk-shell copper hydroxysulfates at room-temperature with adjustable sizes**

Hongyi Gao,<sup>a</sup> Ge Wang,<sup>\*a</sup> Yi Luan,<sup>a</sup> Kullapat Chaikittikul,<sup>a</sup> Xiaowei Zhang,<sup>a</sup> Mu Yang,<sup>a</sup> Wenjun Dong<sup>b</sup> and Zhan Shi<sup>c</sup>

<sup>a</sup> School of Materials Science and Engineering, University of Science and Technology Beijing, Beijing 100083, China

E-mail: [gewang@mater.ustb.edu.cn](mailto:gewang@mater.ustb.edu.cn)

<sup>b</sup> Key Laboratory of Advanced Textile Materials and Manufacturing, Zhejiang Science and Technology University, Hangzhou 310018, China

<sup>c</sup> State Key Laboratory of Inorganic Synthesis and Preparative Chemistry, College of Chemistry, Jilin University, Changchun 130012, China

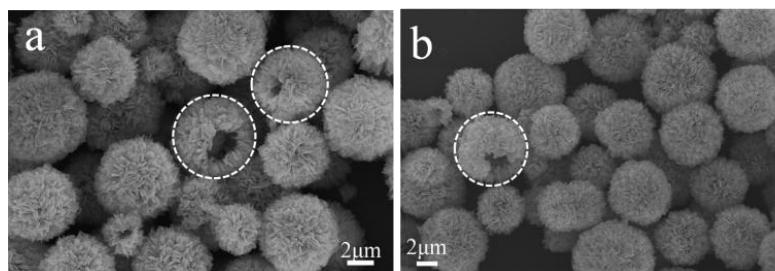

**Fig. S1** SEM images of some yolk-shell spheres in low magnification.

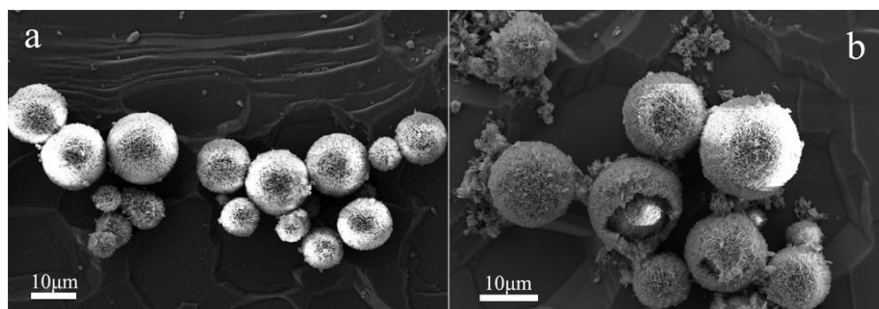

**Fig. S2** (a) An overall SEM image of the yolk-shell products prepared using  $\text{C}_3\text{H}_6(\text{NH}_2)_2$  with a concentration of 0.4 M, (b) SEM image of the broken yolk-shell products after vigorous ultrasonication.

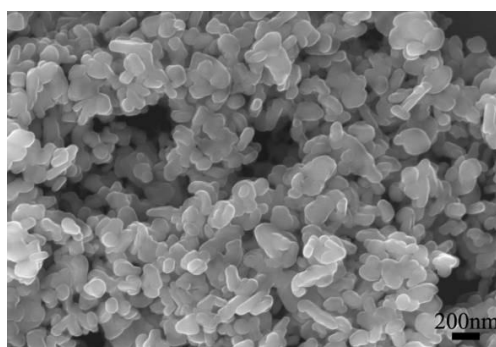

**Fig. S3** SEM image of the products prepared using  $\text{Cu}(\text{NO}_3)_2$  as initial solution.

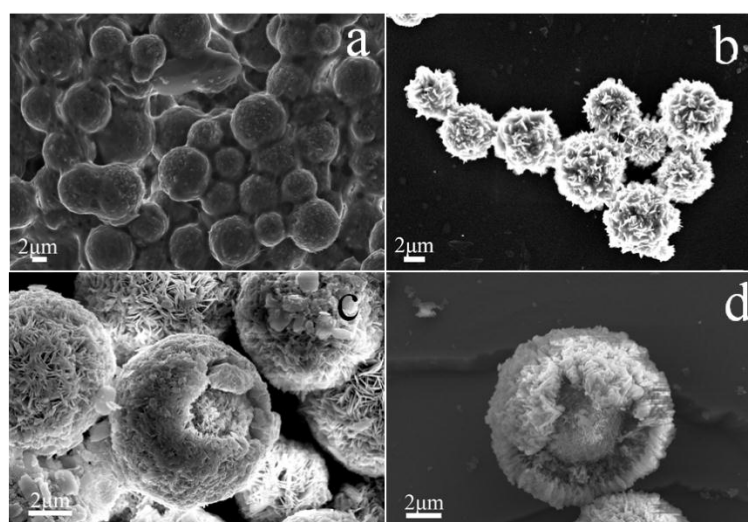

**Fig. S4** SEM image of the products synthesized for different reaction time maintaining temperature at 5 °C, (a) 2 min; (b) 5 min; (c) 10 min; (d) 120 min. The products in Fig. S3c were destroyed by ultrasonic cell disruptor and in Fig. S3d were destroyed under vigorous ultrasonication.

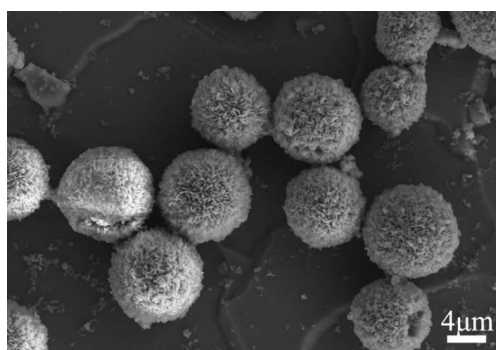

**Fig. S5** SEM image of the yolk-shell products prepared in a large-scale experiment.

**Table S1** Performance of the products for the oxidation of styrene by TBHP. ( $C_{\text{bzh}}$ , selectivity of benzaldehyde;  $C_{\text{so}}$ , selectivity of styrene oxide;  $C_{\text{o}}$ , selectivity of other by-products)

| Reaction time | Conversion (%) | $C_{\text{bzh}}$ (%) | $C_{\text{so}}$ (%) | $C_{\text{o}}$ (%) |
|---------------|----------------|----------------------|---------------------|--------------------|
| 3h            | 91.9           | 78.2                 | 12.2                | 9.6                |
| 6h            | 93.6           | 76.9                 | 12.4                | 10.7               |
| 9h            | 95.9           | 74.1                 | 14.9                | 11.0               |

Reaction conditions: Styrene (1 mmol), catalyst (10 mg) and TBHP (5 mmol) dispersed in  $\text{CH}_3\text{CN}$  (5 mL) at 60 °C.

**Table S2** Recyclability of the products for the oxidation of styrene by TBHP. ( $C_{\text{bzh}}$ , selectivity of benzaldehyde;  $C_{\text{so}}$ , selectivity of styrene oxide;  $C_{\text{o}}$ , selectivity of other by-products)

| Run | Conversion (%) | $C_{\text{bzh}}$ (%) | $C_{\text{so}}$ (%) | $C_{\text{o}}$ (%) |
|-----|----------------|----------------------|---------------------|--------------------|
| 1   | 91.3           | 74.4                 | 14.3                | 11.3               |
| 2   | 90.5           | 79.1                 | 11.1                | 9.8                |
| 3   | 88.4           | 78.4                 | 13.4                | 8.2                |
| 4   | 87.4           | 81.0                 | 9.1                 | 9.9                |
| 5   | 86.5           | 78.9                 | 10.8                | 10.3               |

Reaction conditions: Styrene (1 mmol), catalyst (10 mg) and TBHP (5 mmol) dispersed in  $\text{CH}_3\text{CN}$  (5 mL) at 60 °C for 6 h.

**Table S3** Performance of the products synthesized using different concentration of  $\text{C}_3\text{H}_6(\text{NH}_2)_2$  for the oxidation of styrene by TBHP. ( $C_{\text{bzh}}$ , selectivity of benzaldehyde;  $C_{\text{so}}$ , selectivity of styrene oxide;  $C_{\text{o}}$ , selectivity of other by-products)

| Products with different size | Conversion (%) | $C_{\text{bzh}}$ (%) | $C_{\text{so}}$ (%) | $C_{\text{o}}$ (%) |
|------------------------------|----------------|----------------------|---------------------|--------------------|
| 7 $\mu\text{m}$              | 93.8           | 78.8                 | 12.6                | 8.6                |
| 5.5 $\mu\text{m}$            | 94.1           | 75.3                 | 13.7                | 11.0               |
| 4 $\mu\text{m}$              | 95.3           | 75.7                 | 12.2                | 12.1               |

Reaction conditions: Styrene (1 mmol), catalyst (10 mg) and TBHP (5 mmol) dispersed in  $\text{CH}_3\text{CN}$  (5 mL) at 60 °C for 6 h.

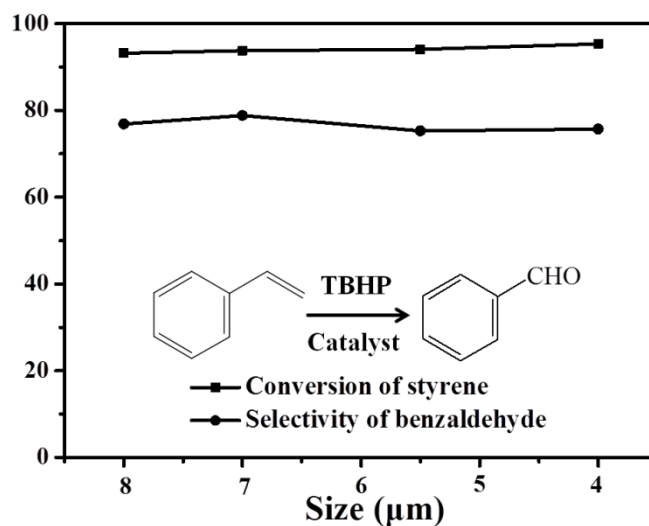

**Fig. S6** Conversion of styrene, as well as the selectivity of benzaldehyde versus the size of the yolk-shell products catalyzed by yolk-shell copper hydroxysulfates. Reaction conditions: Styrene (1 mmol), catalyst (10 mg) and TBHP (5 mmol) dispersed in CH<sub>3</sub>CN (5 mL) for 6 h.
